# Supplementary material for: Computational Identification of Tissue-Specific Splicing Regulatory Elements in Human Genes from RNA-Seq Data
Source: PLoS One. 2016 Nov 18;11(11):e0166978. doi: 10.1371/journal.pone.0166978 (PMC5115852; doi:10.1371/journal.pone.0166978)
Supplement: S4 File — (XLSX) [file pone.0166978.s005.xlsx]

## Sheet: Table 1
GO enrichment analysis of gene sets that contain the identified brain-specific enhancers
Enhancer element	ID	Annotation	p-value	Popultaion Total	Population count	Study total	Study count
GATGTC	GO:0001933	negative regulation of protein phosphorylation	2.01e-05	5096	55	268	12
GACCGT	GO:0043046	DNA methylation involved in gamete generation	2.65e-05	5096	5	72	3
CTCGTCGA	GO:0000737	DNA catabolic process, endonucleolytic	5.53e-05	5096	16	4	2
GCTGTCG	GO:0051497	negative regulation of stress fiber assembly	0.000129098	5096	3	34	2
CGACCGT	GO:0034394	protein localization to cell surface	0.00015591	5096	6	17	2
CGTCGA	GO:0000737	DNA catabolic process, endonucleolytic	0.000200402	5096	16	38	3
CGACCG	GO:0007043	cell-cell junction assembly	0.000206664	5096	12	52	3
GAGCGA	GO:0007616	long-term memory	0.000235269	5096	7	99	3
GTGACG	GO:0045116	protein neddylation	0.000268524	5096	2	84	2
CGGAAGA	GO:0042428	serotonin metabolic process	0.000270088	5096	3	49	2
CGGAACCG	GO:0008543	fibroblast growth factor receptor signaling pathway	0.00027191	5096	45	15	3
TCGGAT	GO:0021553	olfactory nerve development	0.000281542	5096	2	86	2
GGACAT	GO:0070252	actin-mediated cell contraction	0.000284536	5096	16	202	5
AATCGA	GO:0048708	astrocyte differentiation	0.000298482	5096	13	54	3
ATGACGA	GO:0060291	long-term synaptic potentiation	0.000309437	5096	5	29	2
CGTCGT	GO:0001505	regulation of neurotransmitter levels	0.000354835	5096	30	59	4
GACGACT	GO:0051297	centrosome organization	0.000362749	5096	35	21	3
AACGACT	GO:0031290	retinal ganglion cell axon guidance	0.00040028	5096	6	27	2
GATGGA	GO:0006112	energy reserve metabolic process	0.000436199	5096	45	327	10
AGAACG	GO:0007411	axon guidance	0.000446116	5096	104	90	8
GGAGAC	GO:0046928	regulation of neurotransmitter secretion	0.00048841	5096	4	257	3
GGAATCC	GO:0006568	tryptophan metabolic process	0.000537379	5096	3	69	2
CGATCC	GO:0045338	farnesyl diphosphate metabolic process	0.000553111	5096	3	70	2
CGACGTTCG	GO:0001835	blastocyst hatching	0.000588697	5096	1	3	1
TGATGAA	GO:0048532	anatomical structure arrangement	0.000616312	5096	2	127	2
GACGTC	GO:0045684	positive regulation of epidermis development	0.000618288	5096	3	74	2
ACGATC	GO:0060749	mammary gland alveolus development	0.000628408	5096	4	53	2
GAGAGC	GO:0021983	pituitary gland development	0.000700847	5096	9	262	4
AAGATG	GO:0000278	mitotic cell cycle	0.000748313	5096	236	402	33
CGGATG	GO:0071480	cellular response to gamma radiation	0.000749496	5096	2	140	2
GACGTTCG	GO:0001835	blastocyst hatching	0.000784929	5096	1	4	1
AATCCG	GO:0015893	drug transport	0.000860309	5096	4	62	2
TCGTCGTC	GO:0030010	establishment of cell polarity	0.000881629	5096	26	9	2
CGAGGAT	GO:0043604	amide biosynthetic process	0.000951286	5096	9	27	2
AACGAC	GO:0050919	negative chemotaxis	0.000974838	5096	4	66	2
CGGACG	GO:0007549	dosage compensation	0.00100457	5096	4	67	2
GTGGAG	GO:0030031	cell projection assembly	0.00104042	5096	100	347	16
GATCGT	GO:0045087	innate immune response	0.00107982	5096	206	65	9
GAAGATC	GO:0051103	DNA ligation involved in DNA repair	0.00115187	5096	3	101	2
GGATTC	GO:0003197	endocardial cushion development	0.00124094	5096	2	180	2
TGGACCG	GO:0050982	detection of mechanical stimulus	0.00125563	5096	9	31	2
CCGGGA	GO:0045494	photoreceptor cell maintenance	0.0013007	5096	7	177	3
CGGGAG	GO:0007163	establishment or maintenance of cell polarity	0.00131928	5096	47	184	7
CAAGGAA	GO:0036092	phosphatidylinositol-3-phosphate biosynthetic process	0.00144108	5096	3	113	2
TCGTCGTCA	GO:0032318	regulation of Ras GTPase activity	0.00157677	5096	84	4	2
GCTGCGC	GO:0008217	regulation of blood pressure	0.00158453	5096	22	55	3
CGACGT	GO:0007519	skeletal muscle tissue development	0.00163468	5096	39	32	4
TCACCG	GO:0033137	negative regulation of peptidyl-serine phosphorylation	0.00165234	5096	4	86	2
GGAACG	GO:1902305	regulation of sodium ion transmembrane transport	0.00165234	5096	4	86	2
TCTCCGGA	GO:0007169	transmembrane receptor protein tyrosine kinase signaling pathway	0.00170945	5096	186	15	4
CTCCGGA	GO:0035116	embryonic hindlimb morphogenesis	0.00171518	5096	8	41	2
TCGACCG	GO:0010634	positive regulation of epithelial cell migration	0.00174376	5096	25	13	2
AGCGTCGTCG	GO:0001778	plasma membrane repair	0.0017654	5096	3	3	1
GAAGAAGACG	GO:2000505	regulation of energy homeostasis	0.0017654	5096	3	3	1
ATCCCG	GO:0033137	negative regulation of peptidyl-serine phosphorylation	0.00184881	5096	4	91	2
CGTCGTCG	GO:0060434	bronchus morphogenesis	0.00196155	5096	2	5	1
CGAAGA	GO:1901385	regulation of voltage-gated calcium channel activity	0.00202365	5096	3	134	2
CGTCGAC	GO:0090210	regulation of establishment of blood-brain barrier	0.00215856	5096	1	11	1
TGACGA	GO:0007032	endosome organization	0.00247873	5096	5	82	2
ATGACG	GO:0007212	dopamine receptor signaling pathway	0.00247873	5096	5	82	2
CGCCGA	GO:0016197	endosomal transport	0.00255271	5096	43	69	4
TCGTCCA	GO:0051492	regulation of stress fiber assembly	0.00272776	5096	14	29	2
TCAAGAA	GO:0051384	response to glucocorticoid	0.00314049	5096	24	133	4
CAACGC	GO:0010921	regulation of phosphatase activity	0.0032083	5096	27	57	3
ATGGAC	GO:0006936	muscle contraction	0.00344079	5096	52	196	7
TTCGGAT	GO:0007269	neurotransmitter secretion	0.00383549	5096	20	24	2
ATCCGGA	GO:0009988	cell-cell recognition	0.00396012	5096	14	35	2
GGAGACC	GO:0042060	wound healing	0.00437504	5096	167	80	8
TGGACCT	GO:0015701	bicarbonate transport	0.00439171	5096	7	76	2
ATCCGGAG	GO:0035640	exploration behavior	0.00528996	5096	3	9	1
GAATCC	GO:0034614	cellular response to reactive oxygen species	0.00531662	5096	19	197	4
ACTCCG	GO:0071230	cellular response to amino acid stimulus	0.00579922	5096	8	76	2
AACGACTG	GO:0002021	response to dietary excess	0.00646297	5096	3	11	1
ACCGGGA	GO:0007269	neurotransmitter secretion	0.00718395	5096	20	33	2
TCCTCGG	GO:0043407	negative regulation of MAP kinase activity	0.00741376	5096	13	52	2
TGGACCTG	GO:0060271	cilium morphogenesis	0.00969135	5096	65	35	3
GACGCA	GO:0006906	vesicle fusion	0.0145064	5096	12	80	2
ATCGACC	GO:0042596	fear response	0.0146368	5096	5	15	1
CCGGCGAC	GO:0051205	protein insertion into membrane	0.0171502	5096	8	11	1

## Sheet: Table 2
GO enrichment analysis of gene sets that contain the identified heart-specific enhancers
Enhancer element	ID	Annotation	p-value	Population Total	Population count	Study total	Study count
GCCGTC	GO:0044336	canonical Wnt signaling pathway involved in negative regulation of apoptotic process	8.86e-06	4689	3	98	3
CGTCCT	GO:0016446	somatic hypermutation of immunoglobulin genes	8.59e-05	4689	5	98	3
CGGAAGC	GO:1900119	positive regulation of execution phase of apoptosis	0.000125375	4689	2	53	2
CGACTG	GO:0001766	membrane raft polarization	0.000183423	4689	2	64	2
CGAGGAC	GO:0090050	positive regulation of cell migration involved in sprouting angiogenesis	0.000235579	4689	4	30	2
GACATCG	GO:0006743	ubiquinone metabolic process	0.000268461	4689	4	32	2
TCTTCGA	GO:0070252	actin-mediated cell contraction	0.000285089	4689	19	33	3
TCGGAA	GO:0030207	chondroitin sulfate catabolic process	0.000317168	4689	2	84	2
GGATCC	GO:0030837	negative regulation of actin filament polymerization	0.000450788	4689	11	170	4
ACGACG	GO:0051329	mitotic interphase	0.000533853	4689	4	45	2
ATCGTC	GO:0001778	plasma membrane repair	0.000918958	4689	4	59	2
ACGTCCT	GO:0070301	cellular response to hydrogen peroxide	0.00103935	4689	9	26	2
CGATCG	GO:2001022	positive regulation of response to DNA damage stimulus	0.00112671	4689	11	22	2
CGGAAG	GO:2000473	positive regulation of hematopoietic stem cell migration	0.00117187	4689	2	161	2
AATCCGGC	GO:0060746	parental behavior	0.00127959	4689	1	6	1
AAGACG	GO:0010976	positive regulation of neuron projection development	0.00131058	4689	23	101	4
GCTGACGA	GO:0033364	mast cell secretory granule organization	0.00149286	4689	1	7	1
TTCGGAA	GO:0050672	negative regulation of lymphocyte proliferation	0.00210009	4689	11	30	2
CGTGGAA	GO:0032648	regulation of interferon-beta production	0.00222145	4689	9	38	2
ACTCCGAC	GO:0042723	thiamine-containing compound metabolic process	0.00255782	4689	2	6	1
TGGCGA	GO:0050881	musculoskeletal movement	0.0026557	4689	6	64	2
GGCGTC	GO:0010881	regulation of cardiac muscle contraction by regulation of the release of sequestered calcium ion	0.00284972	4689	5	81	2
TTCGCC	GO:0048524	positive regulation of viral process	0.00299397	4689	6	68	2
CCGGAATC	GO:0051965	positive regulation of synapse assembly	0.00383468	4689	3	6	1
GCGTCC	GO:0021889	olfactory bulb interneuron differentiation	0.00414997	4689	5	98	2
CTTCGGCGA	GO:0007157	heterophilic cell-cell adhesion	0.00574834	4689	9	3	1
GATGGACA	GO:0050773	regulation of dendrite development	0.00647008	4689	24	24	2
TCTTCGGA	GO:0035234	ectopic germ cell programmed cell death	0.00702275	4689	3	11	1
TTCGGCGA	GO:0007157	heterophilic cell-cell adhesion	0.00765791	4689	9	4	1
ATTCGCC	GO:0035023	regulation of Rho protein signal transduction	0.00898642	4689	49	14	2
CGATGAC	GO:0019530	taurine metabolic process	0.0114844	4689	2	27	1
CCCGGAA	GO:0048731	system development	0.0121097	4689	783	45	14
ATTCGC	GO:0035023	regulation of Rho protein signal transduction	0.062054	4689	49	39	2

## Sheet: Table 3
GO enrichment analysis of gene sets that contain the identified liver-specific enhancers
Enhancer element	ID	Annotation	p-value	Population Total	Population count	Study total	Study count
CGAAGCC	GO:0009395	phospholipid catabolic process	0.000250717	3478	5	18	2
TCCGAC	GO:0007492	endoderm development	0.000517729	3478	4	33	2
CGGCGC	GO:0007567	parturition	0.00154439	3478	3	80	2
GACGCCG	GO:0050764	regulation of phagocytosis	0.00180661	3478	12	19	2
ACGTCG	GO:0048546	digestive tract morphogenesis	0.00202074	3478	9	27	2
TCGAAC	GO:0002042	cell migration involved in sprouting angiogenesis	0.00402303	3478	11	31	2
CAAGAAGC	GO:0071476	cellular hypotonic response	0.00488787	3478	1	17	1
CTACGG	GO:0014706	striated muscle tissue development	0.00563814	3478	39	33	3
CGTCAA	GO:0015748	organophosphate ester transport	0.00704464	3478	16	30	3
CATGGA	GO:0032526	response to retinoic acid	0.00811443	3478	17	171	4
GGCGCCG	GO:0044246	regulation of multicellular organismal metabolic process	0.0451902	3478	5	32	1

## Sheet: Table 4
GO enrichment analysis of gene sets that contain the identified muscle-specific enhancers
Enhancer element	ID	Annotation	p-value	Population Total	Population count	Study total	Study count
CGGACC	GO:0021756	striatum development	0.000213109	2021	2	30	2
TGATCG	GO:0044070	regulation of anion transport	0.00036926	2021	3	23	2
GCTGCG	GO:0002027	regulation of heart rate	0.00046724	2021	6	60	3
TCTTCG	GO:0006650	glycerophospholipid metabolic process	0.00107234	2021	23	42	4
CGATGAA	GO:0006921	cellular component disassembly involved in execution phase of apoptosis	0.00134107	2021	9	13	2
ACATCG	GO:0090257	regulation of muscle system process	0.00253022	2021	24	24	3
CTTCGGAC	GO:0007020	microtubule nucleation	0.00296736	2021	2	3	1
TCCTGC	GO:0032319	regulation of Rho GTPase activity	0.00347904	2021	16	140	5
CTCGGACC	GO:0006695	cholesterol biosynthetic process	0.00444883	2021	3	3	1
